# Supplementary material for: Klebsiella Phage vB_KleM-RaK2 — A Giant Singleton Virus of the Family Myoviridae
Source: PubMed Central journal article supplement (PMC3622015; doi:10.1371/journal.pone.0060717), 2013-04-09
Supplement: pone.0060717.s001.pdf [file pone.0060717.s001.pdf]

**TABLE S1. Bacterial strains used in this study.**

| Strain                                         | Relevant characteristics                                                                                                                                 | Source or reference         |
|------------------------------------------------|----------------------------------------------------------------------------------------------------------------------------------------------------------|-----------------------------|
| <i>Acinetobacter baumannii</i> #16, #46        |                                                                                                                                                          | Prof. E. Suziedeliene       |
| <i>Acinetobacter</i> sp. 3#9, 13#23            |                                                                                                                                                          | Prof. E. Suziedeliene       |
| <i>Arthrobacter globiformis</i> NRRL B-2979    | wild type                                                                                                                                                | Casaite et al. 2011         |
| <i>Arthrobacter crystallopoietes</i> DSM 20117 | type strain                                                                                                                                              | DSMZ                        |
| <i>Arthrobacter</i> sp. BL-3, PY-21, PY-22     | environmental isolates                                                                                                                                   | Stanislauskiene et al. 2012 |
| <i>Buttiauxella</i> sp. S1-1                   | environmental isolate                                                                                                                                    | This study                  |
| <i>Citrobacter freundii</i>                    |                                                                                                                                                          | Prof. E. Suziedeliene       |
| <i>Enterobacter</i> sp. VT1-1                  | environmental isolate                                                                                                                                    | This study                  |
| <i>Enterobacter cloacae</i>                    |                                                                                                                                                          | Prof. E. Suziedeliene       |
| <i>Erwinia carotovora</i> 8982, 961-63         |                                                                                                                                                          | Prof. E. Suziedeliene       |
| <i>Escherichia coli</i> B <sup>E</sup>         | sup <sup>0</sup>                                                                                                                                         | Dr. L. W. Black             |
| <i>Escherichia coli</i> BL21 (DE3)             | F <sup>-</sup> dcm ompT hsdS(rB <sup>-</sup> mB <sup>-</sup> )<br>gal λ(DE3)                                                                             | Avidis                      |
| <i>Escherichia coli</i> B834 (DE)              | F <sup>-</sup> hsdS metE gal ompT                                                                                                                        | Dr. L. W. Black             |
| <i>Escherichia coli</i> CR63                   | supD, ser                                                                                                                                                | Dr. K. N. Kreuzer           |
| <i>Escherichia coli</i> DH5α                   | F <sup>-</sup> endA1 glnV44 thi-1<br>recA1 relA1 gyrA96 deoR<br>nupG Φ80dlacZΔM15<br>Δ(lacZYA-argF)U169,<br>hsdR17(rK <sup>-</sup> mK <sup>+</sup> ), λ- | Pharmacia                   |

---

|                                         |                                                                                                                                                                                                                                    |                   |
|-----------------------------------------|------------------------------------------------------------------------------------------------------------------------------------------------------------------------------------------------------------------------------------|-------------------|
| <i>Escherichia coli</i> DH10 $\beta$    | F <sup>-</sup> endA1 recA1 galE15<br>galK16 nupG rpsL $\Delta$ lacX74<br>$\Phi$ 80lacZ $\Delta$ M15 araD139<br>$\Delta$ (ara,leu)7697 mcrA <sup>-</sup><br>$\Delta$ (mrr-hsdRMS-mcrBC) $\lambda$ <sup>-</sup>                      | Invitrogen        |
| <i>Escherichia coli</i> GM2163          | dam-13::Tn 9 dcm-6 hsdR2<br>leuB6 his-4 thi-1 ara-14<br>lacY1 galK2 galT22 xyl-5<br>mtl-1 rpsL136 tonA31 tsx-<br>78 supE44 McrA <sup>-</sup> McrB <sup>-</sup>                                                                     | Fermentas         |
| <i>Escherichia coli</i> JM109           | endA1 glnV44 thi-1 relA1<br>gyrA96 recA1 mcrB <sup>+</sup> $\Delta$ (lac-<br>proAB) e14- [F' traD36<br>proAB <sup>+</sup> lacI <sup>q</sup> lacZ $\Delta$ M15]<br>hsdR17(r <sub>K</sub> <sup>-</sup> m <sub>K</sub> <sup>+</sup> ) | Fermentas         |
| <i>Escherichia coli</i> MH1             | araD139 $\Delta$ lacX74 galU <sup>-</sup><br>galK <sup>-</sup> hsr hsm rpsL                                                                                                                                                        | Dr. K. N. Kreuzer |
| <i>Escherichia coli</i> Nova Blue (DE3) | endA1 hsdR17(r <sub>K12</sub> <sup>-</sup> m <sub>K12</sub> <sup>+</sup> )<br>supE44 thi-1 recA1 gyrA96<br>relA1lac [F'/proA <sup>+</sup> B <sup>+</sup><br>lacI <sup>q</sup> Z $\Delta$ M15::Tn10 (Tet <sup>r</sup> )]            | Avidis            |
| <i>Escherichia coli</i> XL1 Blue        | endA1 gyrA96(nal <sup>r</sup> ) thi-1<br>recA1 relA1 lac glnV44<br>F'[::Tn10 proAB <sup>+</sup> lacI <sup>q</sup><br>(lacZ)M15 Amy Cm <sup>r</sup> ]                                                                               | Stratagene        |

---

---

|                                                       |                                                                                                                                                                      |                         |
|-------------------------------------------------------|----------------------------------------------------------------------------------------------------------------------------------------------------------------------|-------------------------|
|                                                       | hsdR17( $r_K^- m_K^+$ ) (Tet <sup>r</sup> )                                                                                                                          |                         |
| <i>Klebsiella</i> sp. KV-1                            | environmental isolate                                                                                                                                                | This study              |
| <i>Klebsiella</i> sp. KV-3                            | phage host, pig farm<br>sewage, Amp <sup>r</sup> , Str <sup>r</sup> , Tet <sup>r</sup> ,<br>Kan <sup>s</sup> , Gm <sup>s</sup> , Nc <sup>s</sup> , Cl <sup>r/s</sup> | This study              |
| <i>Klebsiella pneumoniae</i> ATCC BAA –<br>1705       |                                                                                                                                                                      | ATCC                    |
| <i>Klebsiella oxytoca</i> ATCC 8724                   |                                                                                                                                                                      | ATCC                    |
| <i>Klebsiella pneumoniae</i> 279                      |                                                                                                                                                                      | Prof. E. Suziedeliene   |
| <i>Pseudomonas aeruginosa</i> PAO1                    |                                                                                                                                                                      | Prof. E. Suziedeliene   |
| <i>Pseudomonas brenneri</i> D14                       |                                                                                                                                                                      | Prof. E. Suziedeliene   |
| <i>Pseudomonas</i> sp. PV1-1, RA1-1,<br>RA1-3, RA1-11 | environmental isolates                                                                                                                                               | This study              |
| <i>Rhodococcus erythropolis</i> SQ1                   |                                                                                                                                                                      | Quan and Dabbs,<br>1993 |
| <i>Rhodococcus</i> sp. PY11                           | environmental isolate                                                                                                                                                | Semėnaitė et al. 2000   |
| <i>Salmonella enterica</i> ser. Typhimurium<br>292    |                                                                                                                                                                      | Prof. E. Suziedeliene   |

---

Strains designated “this study” were isolated in Lithuania. To identify bacterial isolates 16S rRNA gene-based sequence analysis was performed. Amp – ampicillin; Kan – kanamycin; Str – streptomycin; Tc – tetracycline; Gm – gentamicin; Nc – neomycin; Cm – chloramphenicol; Nal – nalidixic acid; <sup>r</sup> – resistant; <sup>s</sup> – susceptible.
