# Supplementary material for: Klebsiella Phage vB_KleM-RaK2 — A Giant Singleton Virus of the Family Myoviridae
Source: PubMed Central journal article supplement (PMC3622015; doi:10.1371/journal.pone.0060717), 2013-04-09
Supplement: pone.0060717.s002.pdf [file pone.0060717.s002.pdf]

**TABLE S2. The list of RaK2 ORFs with functional assignment.**

| <b>RaK2 ORF<br/>(protein length aa)</b> | <b>Predicted product</b>         | <b>Reference<br/>organism<br/>locus tag<br/>(protein length<br/>aa)</b>     | <b>Amino acid<br/>sequence identity<br/>/similarity<br/>(length of the<br/>overlapping<br/>segment)</b> | <b><i>E-value</i></b> | <b>Homologue in<br/><i>Cronobacter</i> phage<br/>vB_CsaM_GAP32</b> |
|-----------------------------------------|----------------------------------|-----------------------------------------------------------------------------|---------------------------------------------------------------------------------------------------------|-----------------------|--------------------------------------------------------------------|
| ORF010<br>(123)                         | probable phage<br>protein        | <i>Neisseria<br/>meningitidis</i> ATCC<br>13091<br>HMPREF0602_0060<br>(106) | 32/55 (112)                                                                                             | 7e-10                 | AFC21610.1                                                         |
| ORF011<br>(105)                         | hypothetical protein             | <i>Erwinia</i> phage<br>phiEa21-4<br>g13 (91)                               | 32/53 (96)                                                                                              | 0.96                  | AFC21611.1                                                         |
| ORF021<br>(192)                         | putative thymidine<br>kinase     | Enterobacteria phage<br>phi92<br>PHI92_080 (187)                            | 49/69 (189)                                                                                             | 7e-53                 | AFC21620.1                                                         |
| ORF029<br>(300)                         | phage lysozyme<br>family protein | <i>Shigella sonnei</i> 53G<br>SS53G_3452 (149)                              | 37/51 (158)                                                                                             | 9e-19                 | AFC21630.1                                                         |
| ORF031<br>(368)                         | multifunctional<br>CCA protein   | <i>Coxiella burnetii</i><br>'MSU Goat Q177'<br>(376)                        | 46/62 (274)                                                                                             | 5e-68                 | AFC21636.1                                                         |
| ORF032<br>(174)                         | NudE nudix<br>hydrolase          | <i>Klebsiella</i> phage<br>KP15<br>nudE (131)                               | 42/61 (132)                                                                                             | 8e-29                 | AFC21637.1                                                         |
| ORF033<br>(83)                          | glutaredoxin                     | <i>Pseudomonas</i> phage<br>OBP<br>OBP_012 (88)                             | 49/66 (74)                                                                                              | 3e-15                 | AFC21638.1                                                         |
| ORF038<br>(266)                         | neck protein                     | <i>Stenotrophomonas</i><br>phage Smp14<br>g13 (253)                         | 27/56 (210)                                                                                             | 8e-05                 | AFC21645.1                                                         |

|                 |                                                        |                                                                           |             |       |            |
|-----------------|--------------------------------------------------------|---------------------------------------------------------------------------|-------------|-------|------------|
| ORF039<br>(668) | possible homing<br>endonuclease                        | <i>Campylobacter</i> phage<br>CPt10<br>CPt10_0521 (574)                   | 34/50 (596) | 8e-61 | -----      |
| ORF040<br>(159) | putative<br>deoxynucleoside<br>monophosphate<br>kinase | <i>Cafeteria</i><br><i>roenbergensis</i> virus<br>BV-PW1<br>crov080 (187) | 41/64 (179) | 1e-34 | AFC21647.1 |
| ORF041<br>(889) | phage tail sheath<br>protein                           | <i>Syntrophobacter</i><br><i>fumaroxidans</i> MPOB<br>Sfum_3815(509)      | 35/49 (275) | 4e-33 | AFC21648.1 |
| ORF042<br>(227) | ----                                                   | ----                                                                      | ----        | ----  | AFC21649.1 |
| ORF043<br>(257) | ----                                                   | ----                                                                      | ----        | ----  | AFC21650.1 |
| ORF045<br>(149) | head completion<br>protein                             | <i>Synechococcus</i> phage<br>S-SSM7<br>SSSM7_008 (159)                   | 46/58 (140) | 4e-29 | AFC21652.1 |
| ORF047<br>(206) | ----                                                   | ----                                                                      | ----        | ----  | AFC21654.1 |
| ORF048<br>(181) | ----                                                   | ----                                                                      | ----        | ----  | AFC21655.1 |
| ORF049<br>(315) | ----                                                   | ----                                                                      | ----        | ----  | AFC21656.1 |
| ORF050<br>(304) | ----                                                   | ----                                                                      | ----        | ----  | AFC21657.1 |
| ORF051<br>(134) | ----                                                   | ----                                                                      | ----        | ----  | AFC21658.1 |
| ORF053<br>(445) | ATPase                                                 | <i>Sulfuricurvum</i><br><i>kujiense</i> DSM 16994<br>Sulku_0344 (330)     | 31/47 (404) | 2e-43 | AFC21660.1 |

|                   |                                                     |                                                                  |             |       |            |
|-------------------|-----------------------------------------------------|------------------------------------------------------------------|-------------|-------|------------|
| ORF054<br>(462)   | metallopeptidase-<br>related<br>protein             | <i>Desulfovibrio</i><br><i>alaskensis</i> G20<br>Dde_0484 (444)  | 28/41 (482) | 1e-44 | AFC21661.1 |
| ORF059<br>(310)   | thymidylate<br>synthase                             | <i>Halorhodospira</i><br><i>halophila</i> SL1<br>Hhal_2047 (264) | 48/60 (309) | 3e-93 | AFC21667.1 |
| ORF060w<br>(510)  | ----                                                | ----                                                             | ----        | ----  | AFC21668.1 |
| ORF061w<br>(115)  | ----                                                | ----                                                             | ----        | ----  | AFC21671.1 |
| ORF062w<br>(371)  | Virion structural<br>protein                        | <i>Pseudomonas</i> phage<br>201phi2-1<br>201phi2-1p230<br>(1480) | 24/53 (255) | 0.014 | AFC21672.1 |
| ORF063<br>(165)   | ----                                                | ----                                                             | ----        | ----  | AFC21673.1 |
| ORF065<br>(410)   | ----                                                | ----                                                             | ----        | ----  | AFC21675.1 |
| ORF066w<br>(157)  | MutT/NUDIX<br>family proteint                       | <i>Ralstonia</i> phage<br>RSL1<br>RSL1_ORF109 (167)              | 36/50 (121) | 6e-12 | AFC21676.1 |
| ORF067w<br>(441)  | tail sheath stabilizer<br>and completion<br>protein | Enterobacteria phage<br>RB49<br>RB49p151 (277)                   | 28/46 (159) | 0.001 | AFC21677.1 |
| ORF068w<br>(486)  | ----                                                | ----                                                             | ----        | ----  | AFC21678.1 |
| ORF069<br>(769)   | ClpA-like protein                                   | <i>Gluconacetobacter</i><br>sp. SXCC-1<br>SXCC_03678(775)        | 40/61 (757) | 0.0   | AFC21679.1 |
| ORF070w<br>(3326) | -----                                               | -----                                                            | -----       | ----- | AFC21680.1 |

|                   |                                                        |                                                                                 |             |       |            |
|-------------------|--------------------------------------------------------|---------------------------------------------------------------------------------|-------------|-------|------------|
| ORF071w<br>(1154) | baseplate wedge                                        | <i>Synechococcus</i> phage<br>S-SM1<br>Ppro_1814 (814)                          | 33/56 (95)  | 4e-04 | AFC21681.1 |
| ORF072w<br>(129)  | phage baseplate<br>assembly protein                    | <i>Natrinema sp. J7-2</i><br>NJ7G_0012 (132)                                    | 35/53 (86)  | 2e-04 | AFC21682.1 |
| ORF073w<br>(162)  | phage lysozyme                                         | <i>Salmonella enterica</i><br><i>subsp. enterica</i><br>ZP_03216458.1 <br>(150) | 47/65 (145) | 5e-36 | AFC21683.1 |
| ORF078w<br>(886)  | baseplate hub<br>subunit and tail<br>lysozyme          | <i>Klebsiella</i> phage<br>KP15<br>gp157 (589)                                  | 28/44 (237) | 1e-10 | AFC21684.1 |
| ORF079w<br>(777)  | -----                                                  | -----                                                                           | -----       | ----- | AFC21685.1 |
| ORF081w<br>(243)  | -----                                                  | -----                                                                           | -----       | ----- | AFC21687.1 |
| ORF082<br>(292)   | sigma factor for late<br>transcription                 | <i>Prochlorococcus</i><br>phage P-SSM4<br>PSSM4_118 (158)                       | 29/55 (99)  | 7e-07 | AFC21688.1 |
| ORF083<br>(346)   | recombination<br>endonuclease<br>subunit               | <i>Synechococcus</i> phage<br>S-SSM7<br>SSSM7_157(347)                          | 33/50 (232) | 9e-18 | AFC21689.1 |
| ORF084<br>(706)   | endonuclease                                           | <i>Synechococcus</i> phage<br>S-CRM01<br>SCRM01_055 (574)                       | 34/51 (250) | 1e-22 | AFC21690.1 |
| ORF086<br>(164)   | endoVII packaging<br>and recombination<br>endonuclease | <i>Salmonella</i> phage<br>PVP-SE1<br>ORF126 (197)                              | 39/55 (131) | 1e-18 | AFC21691.1 |
| ORF087w<br>(286)  | Baseplate hub<br>subunit                               | <i>Synechococcus</i> phage<br>S-PM2<br>g26 (238)                                | 24/57 (144) | 4.7   | AFC21693.1 |

|                   |                                                  |                                                               |             |       |            |
|-------------------|--------------------------------------------------|---------------------------------------------------------------|-------------|-------|------------|
| ORF088<br>(721)   | Phage protein,<br>putative minor<br>tail protein | <i>Weissella<br/>thailandensis.fsh4-2</i><br>WT2_00250 (1150) | 21/55 (597) | 0.79  | AFC21694.1 |
| ORF089<br>(577)   | portal vertex protein                            | <i>Vibrio</i> phage KVP40<br>KVP40.0358 (511)                 | 36/53 (188) | 5e-27 | AFC21695.1 |
| ORF091<br>(257)   | ----                                             | ----                                                          | ----        | ----  | AFC21697.1 |
| ORF092<br>(206)   | prohead core<br>scaffold and<br>protease         | <i>Synechococcus</i> phage<br>S-PM2<br>S-PM2p109 (214)        | 37/59 (164) | 2e-25 | AFC21698.1 |
| ORF094<br>(393)   | major capsid protein                             | <i>Synechococcus</i> phage<br>S-CBM2<br>SWPG_00035 (545)      | 33/48 (401) | 2e-44 | AFC21700.1 |
| ORF098<br>(595)   | Putative tail fiber<br>protein                   | <i>Salmonella enterica</i><br>subsp. enterica (600)           | 23/55 (539) | 2e-05 | AFC21704.1 |
| ORF100<br>(1000)  | DNA polymerase                                   | <i>Vibrio</i> phage KVP40<br>KVP40.0082 (850)                 | 26/42 (915) | 7e-60 | AFC21707.1 |
| ORF104<br>(99)    | 10 kDa chaperonin<br>GroS                        | <i>Coxiella burnetii</i><br>'MSU Goat Q177'<br>A35_A1822 (96) | 42/63 (97)  | 3e-12 | AFC21712.1 |
| ORF105<br>(235)   | ----                                             | ----                                                          | ----        | ----  | AFC21713.1 |
| ORF106w<br>(1039) | ----                                             | ----                                                          | ----        | ----  | AFC21714.1 |
| ORF107w<br>(202)  | ----                                             | ----                                                          | ----        | ----  | AFC21715.1 |
| ORF108<br>(328)   | RNaseH<br>ribonuclease                           | <i>Aeromonas</i> phage<br>Aes508<br>Aes508_202 (304)          | 28/46 (180) | 3e-06 | AFC21716.1 |

|                 |                                                 |                                                                                                      |             |       |            |
|-----------------|-------------------------------------------------|------------------------------------------------------------------------------------------------------|-------------|-------|------------|
| ORF111<br>(889) | terminase large subunit                         | <i>Ralstonia solanacearum</i><br>K60-1<br>RSK60_2210018<br>(1069)                                    | 28/46 (478) | 1e-46 | AFC21719.1 |
| ORF113<br>(361) | single-stranded DNA binding protein             | <i>Aeromonas</i> phage<br>phiAS5<br>ORF106 (301)                                                     | 24/52 (308) | 0.7   | AFC21721.1 |
| ORF114<br>(370) | RecA-like recombination protein                 | <i>Synechococcus</i> phage<br>syn9<br>BSV9_gp174 (336)                                               | 31/52 (302) | 6e-35 | AFC21722.1 |
| ORF117<br>(273) | DNA polymerase III subunit epsilon-like protein | <i>Alicyclobacillus acidocaldarius</i><br><i>subsp. acidocaldarius</i><br>DSM 446<br>Aaci_1500 (240) | 27/44 (237) | 4e-20 | AFC21725.1 |
| ORF118<br>(511) | RNA-DNA + DNA-DNA helicase                      | <i>Synechococcus</i> phage<br>S-SM2<br>SSM2_124 (493)                                                | 30/49 (508) | 3e-55 | AFC21726.1 |
| ORF127<br>(352) | DNA primase                                     | <i>Methylobacterium</i> sp.<br>GXF4<br>WYO_0834 (360)                                                | 29/45 (329) | 5e-34 | AFC21735.1 |
| ORF128<br>(522) | ATP-dependent primase-helicase                  | <i>Campylobacter</i> phage<br>vB_CcoM-IBB_35<br>gp41 (445)                                           | 27/47 (433) | 8e-30 | AFC21736.1 |
| ORF134<br>(577) | Hef-like homing endonuclease                    | <i>Campylobacter</i> phage<br>NCTC12673<br>NCTC12673_gp084<br>(484)                                  | 43/61 (319) | 6e-61 | ----       |
| ORF135<br>(207) | ----                                            | ----                                                                                                 | ----        | ----  | AFC21743.1 |

|                  |                                                                                  |                                                                                  |             |        |            |
|------------------|----------------------------------------------------------------------------------|----------------------------------------------------------------------------------|-------------|--------|------------|
| ORF137<br>(235)  | Putative<br>exonuclease                                                          | SAR86 cluster<br>bacterium<br>J5KER4_9GAMM<br>(227)                              | 39/61 (220) | 7e-42  | AFC21745.1 |
| ORF139<br>(191)  | ----                                                                             | ----                                                                             | ----        | ----   | AFC21747.1 |
| ORF140<br>(771)  | aerobic<br>ribonucleoside<br>diphosphate<br>reductase subunit<br>alpha           | <i>Oceanimonas</i> sp.<br>GK1<br>GU3_11305 (758)                                 | 56/74 (740) | 0.0    | AFC21748.1 |
| ORF141<br>(374)  | nrdB gene product                                                                | <i>Alteromonas<br/>macleodii</i> str. 'Deep<br>ecotype'<br>MADE_1010775<br>(376) | 54/77 (375) | 3e-148 | AFC21750.1 |
| ORF143<br>(246)  | ----                                                                             | ----                                                                             | ----        | ----   | AFC21753.1 |
| ORF144 (246)     | Phosphoribosyl-<br>ATP<br>pyrophosphohydroly-<br>se-domain<br>containing protein | <i>Acanthamoeba<br/>polyphaga</i><br>lentilvirus (251)                           | 30/47 (220) | 7e-14  | ----       |
| ORF145w<br>(214) | ----                                                                             | ----                                                                             | ----        | ----   | AFC21755.1 |
| ORF148<br>(190)  | Dihydrofolate<br>reductase type I                                                | <i>Colwellia</i> phage 9A<br>COPG_00031 (170)                                    | 40/58 (139) | 2e-21  | AFC21758.1 |
| ORF150<br>(452)  | ATP-dependent<br>DNA helicase dda                                                | <i>Sulfurimonas<br/>gotlandica</i> GD1<br>CBGD1_1394 (500)                       | 31/62 (433) | 1e-22  | AFC21760.1 |
| ORF151<br>(186)  | ----                                                                             | ----                                                                             | ----        | ----   | AFC21761.1 |

|                 |                                              |                                                                     |             |       |            |
|-----------------|----------------------------------------------|---------------------------------------------------------------------|-------------|-------|------------|
| ORF153<br>(169) | translation initiation<br>factor IF-3        | <i>Megasphaera<br/>micronuciformis</i><br>F0359<br>infC (167)       | 35/58 (163) | 2e-17 | AFC21763.1 |
| ORF156<br>(305) | hypothetical protein                         | <i>Pseudomonas</i> phage<br>201phi2-1<br>201phi2-1p383 (87)         | 46/63 (63)  | 2e-06 | AFC21767.1 |
| ORF157<br>(656) | topoisomerase II<br>large subunit            | <i>Vibrio</i> phage KVP40<br>KVP40.0045 (597)                       | 30/46 (656) | 4e-52 | AFC21769.1 |
| ORF158<br>(569) | Hef-like homing<br>endonuclease              | <i>Campylobacter</i> phage<br>CP220<br>CPT_0054c (574)              | 32/50 (478) | 1e-48 | ----       |
| ORF159<br>(468) | topoisomerase II<br>small subunit            | <i>Vibrio</i> phage KVP40<br>KVP40.0282 (428)                       | 31/53 (338) | 3e-39 | AFC21770.1 |
| ORF160<br>(775) | ----                                         | ----                                                                | ----        | ----  | AFC21771.1 |
| ORF166<br>(319) | gp44-like sliding<br>clamp loader<br>subunit | <i>Campylobacter</i> phage<br>NCTC12673<br>NCTC12673_gp003<br>(319) | 34/53 (316) | 6e-35 | AFC21777.1 |
| ORF173<br>(227) | putative<br>metallopeptidase                 | Bacteriophage T5<br>T5.087 (233)                                    | 30/49 (174) | 2e-06 | AFC21787.1 |
| ORF175<br>(184) | hypothetical protein                         | <i>Vibrio</i> phage pVp-1<br>pVp-1_0108 (186)                       | 40/56 (176) | 1e-31 | AFC21789.1 |
| ORF182<br>(111) | ----                                         | ----                                                                | ----        | ----  | ----       |
| ORF188<br>(137) | peptidyl-tRNA<br>hydrolase                   | <i>Methanocaldococcus<br/>vulcanius</i> M7<br>Metvu_1090 (115)      | 34/49 (122) | 3e-12 | AFC21834.1 |

|                 |                                                 |                                                                                       |             |       |            |
|-----------------|-------------------------------------------------|---------------------------------------------------------------------------------------|-------------|-------|------------|
| ORF194<br>(297) | putative DNA-<br>methyltransferase              | <i>Vibrio</i> phage<br>ICP1_2006_D<br>TUST1-191_01135<br>(332)                        | 43/55 (337) | 8e-71 | AFC21842.1 |
| ORF233<br>(278) | ----                                            | ----                                                                                  | ----        | ----  | AFC21931.1 |
| ORF244<br>(298) | putative RNA<br>polymerase sigma-<br>70 subunit | <i>Verrucosipora maris</i><br>AB-18-032<br>VAB18032_29206<br>(333)                    | 31/47 (269) | 2e-19 | AFC21949.1 |
| ORF275<br>(565) | ----                                            | ----                                                                                  | ----        | ----  | AFC21480.1 |
| ORF290<br>(226) | endonuclease dda                                | <i>Dickeya dadantii</i><br>3937<br>Dda3937_00087<br>(246)                             | 42/62 (227) | 6e-55 | ----       |
| ORF291<br>(147) | DenV endonuclease                               | Bacteriophage<br>vB_EcoM-VR7<br>VR7_gp129 (138)                                       | 65/80 (131) | 3e-57 | AFC21957.1 |
| ORF318<br>(210) | putative peptidase                              | <i>Yersinia phage</i><br>phiR1-37<br>phiR1-37_gp097<br>(219)                          | 44/62 (206) | 2e-42 | ----       |
| ORF447<br>(172) | putative N-6-<br>adenine-<br>methyltransferase  | <i>Staphylococcus</i><br><i>epidermidis</i><br>NIHLM057<br>HMPREF9989_1113<br>3 (142) | 47/67 (141) | 1e-34 | AFC21516.1 |
| ORF448<br>(178) | cytidyltransferase                              | <i>Prochlorococcus</i><br>phage P-SSM4<br>PSSM4_155 (383)                             | 37/56 (183) | 7e-25 | AFC21517.1 |

|                 |                                                                                                               |                                                                 |             |       |            |
|-----------------|---------------------------------------------------------------------------------------------------------------|-----------------------------------------------------------------|-------------|-------|------------|
| ORF464<br>(381) | RNA ligase 1 and<br>tail fiber attachment<br>catalyst                                                         | <i>Aeromonas</i> phage<br>44RR2.8t<br>44RRORF204c (383)         | 38/57 (361) | 7e-67 | AFC21528.1 |
| ORF470<br>(314) | polynucleotide 5'-<br>kinase and 3'-<br>phosphatase PseT                                                      | <i>Aeromonas</i> phage<br>Aeh1<br>Aeh1p282 (305)                | 35/52 (324) | 7e-44 | AFC21532.1 |
| ORF482<br>(248) | putative<br>serine/threonine<br>protein phosphatase                                                           | <i>Escherichia</i> phage<br>phAPEC8<br>phAPEC8_0086<br>(247)    | 38/58 (216) | 6e-45 | AFC21543.1 |
| ORF486<br>(467) | ATP-dependent<br>DNA ligase                                                                                   | <i>Vibrio</i> phage phi-pp2<br>pp2_055 (447)                    | 31/54 (460) | 6e-60 | AFC21547.1 |
| ORF489<br>(249) | ATP-dependent Clp<br>protease proteolytic<br>subunit                                                          | <i>Alkaliphilus</i><br><i>oremlandii</i><br>Clos_2174 clpP(195) | 46/62 (198) | 4e-44 | AFC21551.1 |
| ORF493<br>(182) | ----                                                                                                          | ----                                                            | ----        | ----  | ----       |
| ORF495<br>(156) | dCMP deaminase                                                                                                | <i>Acinetobacter</i> phage<br>Acj9<br>Acj9p214 (181)            | 44/64 (162) | 2e-38 | AFC21557.1 |
| ORF496<br>(212) | conserved structural<br>protein contains<br>bacterial Ig-like and<br>invasin/intimin cell-<br>adhesion domain | <i>Erwinia</i> phage<br>phiEa116<br>g11600070 (206)             | 46/58 (130) | 3e-17 | AFC21559.1 |
| ORF498<br>(354) | bifunctional<br>nicotinamide<br>mononucleotide<br>adenylyltransferase/<br>AD<br>P-ribose<br>pyrophosphatase   | <i>Burkholderia</i> sp.<br>383<br>Bcep18194_B0825<br>(346)      | 39/57 (349) | 4e-68 | AFC21560.1 |

|                                                               |                                                      |                                                                         |             |        |            |
|---------------------------------------------------------------|------------------------------------------------------|-------------------------------------------------------------------------|-------------|--------|------------|
| ORF500<br>(490)                                               | putative nicotinate<br>phosphoribosyltrans<br>ferase | <i>Psychrobacter<br/>arcticus</i> 273-4<br>Psyc_1914 (465)              | 36/53 (481) | 3e-80  | AFC21562.1 |
| ORF502<br>(245)                                               | NAD-dependent<br>deacetylase                         | <i>Marinobacterium<br/>stanieri</i> S30<br>MstaS_01010001701<br>4 (249) | 35/57 (193) | 5e-28  | AFC21568.1 |
| ORF503<br>(127)                                               | nudix hydrolase                                      | <i>Aeromonas</i> phage<br>PX29<br>PX29p330 (186)                        | 33/49 (147) | 3e-10  | AFC21569.1 |
| ORF506<br>(479)                                               | PhoH-like protein                                    | <i>Oceanospirillum</i> sp.<br>MED92<br>MED92_02121 (464)                | 40/61 (490) | 5e-113 | AFC21571.1 |
| ORF520<br>(601)                                               | nrdD-like anaerobic<br>NTP reductase                 | Enterobacteria phage<br>phi92<br>PHI92_192A (599)                       | 59/75 (602) | 0.0    | AFC21588.1 |
| ORF523<br>(156)                                               | anaerobic NTP<br>reductase activating<br>protein     | <i>Clostridiales</i><br>bacterium<br>1_7_47_FAA<br>CBFG_01379 (174)     | 51/71 (157) | 1e-49  | AFC21591.1 |
| ORF526w<br>(580)                                              | hypothetical protein                                 | <i>Pantoea</i> sp. At-9b<br>Pat9b_0331 (534)                            | 56/75 (476) | 0.0    | ----       |
| ORF527w<br>(715)                                              | gp17                                                 | <i>Klebsiella</i> phage K11<br>ASC_0042 (875)                           | 24/43 (597) | 1e-26  | ----       |
| ORF528w<br>(1114)<br>(41% aa identity<br>with RaK2<br>ORF533) | tail fiber fragment                                  | Enterobacteria<br>phage SP6<br>SP6p38 (320)                             | 28/55 (132) | 2e-05  | ----       |

|                                                               |                                                                           |                                                                              |             |        |      |
|---------------------------------------------------------------|---------------------------------------------------------------------------|------------------------------------------------------------------------------|-------------|--------|------|
| ORF529w<br>(584)<br>(15% aa identity<br>with RaK2<br>ORF526w) | hypothetical protein                                                      | <i>Klebsiella pneumoniae subsp. pneumoniae</i> WGLW5<br>HMPREF1308_0536<br>1 | 35/56 (501) | 6e-88  | ---- |
| ORF530w<br>(779)                                              | hypothetical protein (similar to tail fiber protein of phage vB_EcoP_G7C) | <i>Enterobacter</i> phage IME11<br>IME11_90<br>(896)                         | 46/63 (542) | 3e-153 | ---- |
| ORF531w<br>(895)<br>(40% aa identity<br>with RaK2<br>ORF532)  | hypothetical protein (similar to tail fiber protein of phage K1-5)        | <i>Burkholderia phytofirmans</i> PsJN<br>Bphyt_6273 (503)                    | 30/46 (445) | 2e-30  | ---- |
| ORF532<br>(807)                                               | tailspike protein                                                         | Bacteriophage K1-5<br>EPKV1_gp40 (320)                                       | 30/50 (114) | 1e-04  | ---- |
| ORF533<br>(768)<br>(47% aa identity<br>with RaK2<br>ORF532)   | hypothetical protein                                                      | <i>Klebsiella pneumoniae</i> 342<br>KPK_1664 (582)                           | 34/50 (464) | 5e-57  | ---- |
| ORF534<br>(688)<br>(33% aa identity<br>with RaK2<br>ORF531)   | hypothetical protein                                                      | <i>Vibrio</i> phage ICP2<br>ViPhICP2p14 (542)                                | 33/56 (155) | 9e-20  | ---- |

- functional assignment has been made based on the similarity to biologically defined proteins and/or MS/MS analysis
- podovirus-like proteins are shaded in grey, siphovirus-like in light blue.
