# Supplementary material for: Klebsiella Phage vB_KleM-RaK2 — A Giant Singleton Virus of the Family Myoviridae
Source: PubMed Central journal article supplement (PMC3622015; doi:10.1371/journal.pone.0060717), 2013-04-09
Supplement: pone.0060717.s003.pdf [file pone.0060717.s003.pdf]

**Table. S3 RaK2 virion proteins identified by MS/MS.**

| Gene product | Proposed function                             | MW (kDa) | Sequence coverage (%) | Number of unique peptides |
|--------------|-----------------------------------------------|----------|-----------------------|---------------------------|
| gp010*       | putative virion protein                       | 13.932   | 18.0                  | 3                         |
| gp011        | putative virion protein                       | 12.065   | 42.9                  | 4                         |
| gp038*       | neck protein                                  | 30.294   | 14.3                  | 4                         |
| gp041*       | tail sheath protein                           | 97.191   | 28.3                  | 21                        |
| gp042        | putative virion protein                       | 24.950   | 23.3                  | 5                         |
| gp043        | putative virion protein                       | 28.720   | 17.1                  | 3                         |
| gp047        | putative virion protein                       | 23.356   | 18.9                  | 4                         |
| gp048        | putative virion protein                       | 20.374   | 18.8                  | 3                         |
| gp049        | putative virion protein                       | 34.878   | 17.5                  | 7                         |
| gp050        | conserved phage protein                       | 33.576   | 5.3                   | 1                         |
| gp051        | putative virion protein                       | 14.727   | 18.7                  | 2                         |
| gp060w       | putative virion protein                       | 56.225   | 12.5                  | 5                         |
| gp061w       | putative virion protein                       | 12.577   | 26.1                  | 2                         |
| gp063        | putative virion protein                       | 19.035   | 10.3                  | 2                         |
| gp065        | putative virion protein                       | 45.317   | 13.7                  | 5                         |
| gp068w       | putative virion protein                       | 56.144   | 8.4                   | 4                         |
| gp070w       | putative virion protein                       | 382.000  | 2.2                   | 7                         |
| gp071w*      | baseplate wedge subunit                       | 131.630  | 18.8                  | 16                        |
| gp072w*      | baseplate protein                             | 15.024   | 23.3                  | 3                         |
| gp079w       | putative virion protein                       | 87.857   | 13.4                  | 9                         |
| gp081w       | putative virion protein                       | 27.440   | 6.6                   | 2                         |
| gp087*w      | baseplate protein                             | 32.543   | 10.5                  | 3                         |
| gp089*       | portal vertex protein                         | 64.744   | 13.5                  | 7                         |
| gp091        | putative virion protein                       | 28.205   | 16.7                  | 5                         |
| gp092        | prohead core scaffolding protein and protease | 22.870   | 26.7                  | 6                         |
| gp094*       | major capsid protein                          | 42.756   | 26.5                  | 10                        |
| gp098*       | tail fiber protein                            | 62.869   | 3.7                   | 2                         |

|         |                                                 |         |      |    |
|---------|-------------------------------------------------|---------|------|----|
| gp105   | putative virion protein                         | 27.854  | 21.7 | 5  |
| gp106w  | putative tail protein                           | 24.651  | 55.4 | 13 |
| gp107w  | putative tail protein                           | 21.133  | 53.5 | 11 |
| gp113   | putative single-stranded DNA<br>binding protein | 40.488  | 28.5 | 11 |
| gp135   | putative virion protein                         | 23.259  | 36.2 | 7  |
| gp139   | putative virion protein                         | 21.243  | 31.9 | 5  |
| gp143   | conserved phage protein                         | 14.942  | 7.9  | 1  |
| gp145w  | putative virion protein                         | 25.061  | 10.7 | 2  |
| gp151   | putative virion protein                         | 20.561  | 25.8 | 4  |
| gp156   | putative virion protein                         | 34.198  | 6.2  | 2  |
| gp160   | putative virion protein                         | 87.718  | 8.1  | 6  |
| gp175   | putative virion protein                         | 21.079  | 11.4 | 2  |
| gp182   | conserved phage protein                         | 13.142  | 9.0  | 1  |
| gp233   | putative virion protein                         | 30.971  | 13.7 | 4  |
| gp275   | putative virion protein                         | 64.095  | 34.3 | 20 |
| gp493   | putative virion protein                         | 21.475  | 17.0 | 2  |
| gp496*  | conserved virion protein                        | 22.787  | 22.2 | 4  |
| gp506   | hypothetical protein                            | 53.675  | 6.1  | 4  |
| gp526w* | putative tail protein                           | 63.021  | 28.8 | 15 |
| gp527w* | tail fiber protein                              | 79.449  | 14.3 | 7  |
| gp528w* | tail fiber protein                              | 121.755 | 12.4 | 12 |
| gp529w* | putative tail protein                           | 62.412  | 15.2 | 8  |
| gp530w* | tail protein                                    | 86.033  | 6.3  | 5  |
| gp531w* | putative tail protein                           | 97.727  | 6.8  | 4  |
| gp532*  | tailspike protein                               | 87.260  | 11.4 | 8  |
| gp533*  | putative tail protein                           | 82.794  | 13.0 | 9  |
| gp534*  | putative virion protein                         | 70.781  | 10.6 | 7  |

\*– predicted to be virion proteins by bioinformatics approaches as well.
